# Supplementary material
Source: PubMed Central journal article supplement (PMC307671)

**FIAsh**

**CTB**

**Merged image**

**TC-VP40<sub>1-257</sub>**

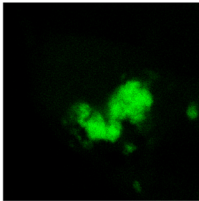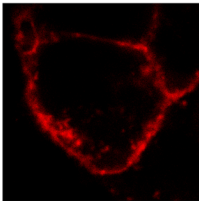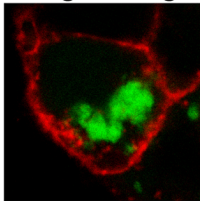

Supplement: pnas_100_26_15936__3.pdf [file pnas_100_26_15936__3.pdf]

**FIAsH**

**anti-GP**

**merged**

**TC-VP40**

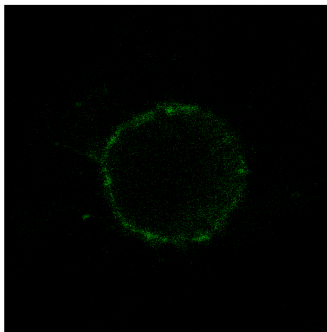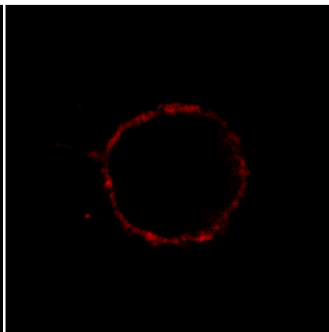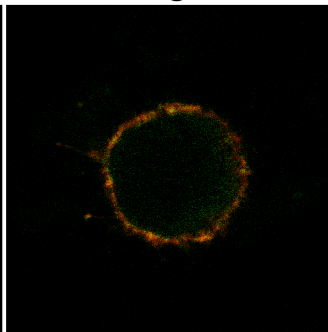

**TC-VP40<sub>1-317</sub>**

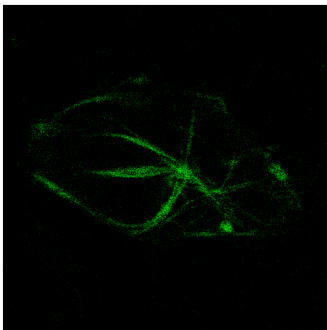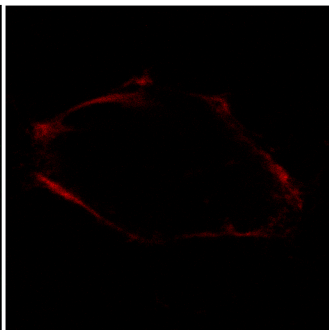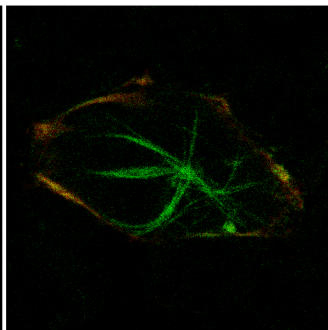

**TC-VP40<sub>1-308</sub>**

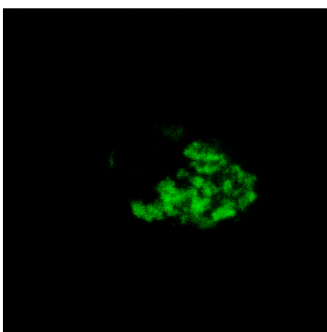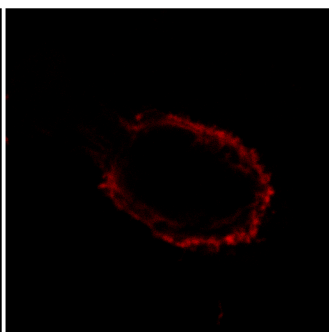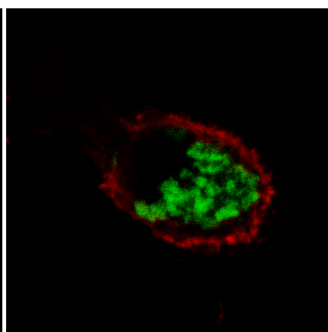

**TC-VP40<sub>P283/286L</sub>**

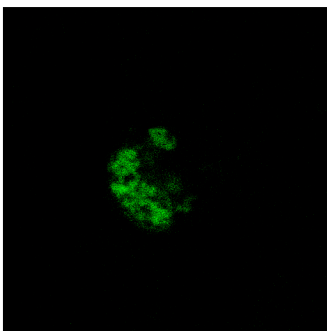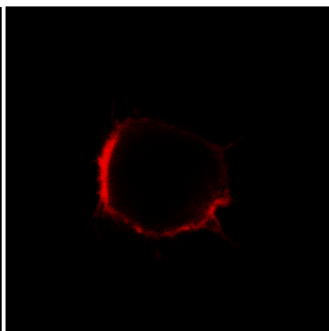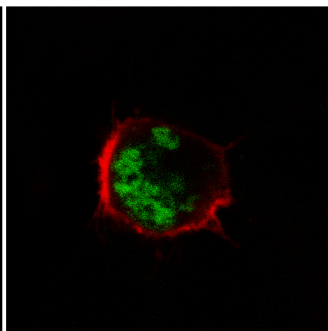

Supplement: pnas_100_26_15936__5.pdf [file pnas_100_26_15936__5.pdf]
